# Supplementary material for: Gene Structures, Classification, and Expression Models of the DREB Transcription Factor Subfamily in Populus trichocarpa
Source: Hindawi journal article supplement (doi:10.1155/2013/954640), 2013-01-01
Supplement: f1 [file 954640.f1.pdf]

stand 1 stand 2 stand 3 Helix

|     | 280       | 290                           | 300    | 310   | 320  | 330 | 340  | 350  | 360 | 370 | 380 | 390 | 400 | 410 |
|-----|-----------|-------------------------------|--------|-------|------|-----|------|------|-----|-----|-----|-----|-----|-----|
| A-1 | PtrDREB60 | -VAVLKKNKAGRKKF               | ---K   | ETRH  | PVYR | GVR | RR   | NGNK | WV  | CEV | REP | EN  | --- | --- |
|     | PtrDREB61 | -VTVLKKKKAGRKKF               | ---K   | ETRH  | PVYR | GVR | RR   | NGNK | WV  | CEV | REP | EN  | --- | --- |
|     | PtrDREB62 | -ATSFPKKRAGRRIF               | ---R   | ETRH  | PVYR | GVR | RR   | NGNK | WV  | CEM | REP | EN  | --- | --- |
|     | PtrDREB63 | -ATSRPKKRAGRRIF               | ---K   | ETRH  | PVYR | GVR | RR   | NGDK | WV  | CEL | REP | EN  | --- | --- |
|     | PtrDREB64 | -ASRNPKKRAGRKKF               | ---R   | ETRH  | PVYR | GVR | RR   | NSGK | WV  | CEV | REP | EN  | --- | --- |
|     | PtrDREB65 | -ASRNPKKRAGRKKF               | ---R   | ETRH  | PVYR | GVR | RR   | NSGK | WV  | CEV | REP | EN  | --- | --- |
| A-2 | PtrDREB3  | QVSKVPGKSKKGMKGGPENMNCRYR     | GVR    | QR    | TW   | GK  | WV   | AE   | IR  | EP  | EN  | --- | --- | --- |
|     | PtrDREB4  | QITKVPKGSKKGMKGGPENKSCRYR     | GVR    | QR    | TW   | GK  | WV   | AE   | IR  | EP  | EN  | --- | --- | --- |
|     | PtrDREB7  | PVRKVPAGSKKGMKGGPENSVCNRYR    | GVR    | QR    | TW   | GK  | WV   | AE   | IR  | EP  | EN  | --- | --- | --- |
|     | PtrDREB8  | PVRKVPAGSKKGMKGGPENSVCNRYR    | GVR    | QR    | TW   | GK  | WV   | AE   | IR  | EP  | EN  | --- | --- | --- |
|     | PtrDREB9  | QFKKPAQASSRKGCMRGKGGPENALCTYK | GVR    | QR    | TW   | GK  | WV   | AE   | IR  | EP  | EN  | --- | --- | --- |
|     | PtrDREB10 | QFKKPEQASSRKGCMRGKGGPENALCTYK | GVR    | QR    | TW   | GK  | WV   | AE   | IR  | EP  | EN  | --- | --- | --- |
|     | PtrDREB5  | NCGKSPKPKWKKGPTRGKGGPQAMCDYR  | GVR    | QR    | TW   | GK  | WV   | AE   | IR  | EP  | EN  | --- | --- | --- |
|     | PtrDREB6  | NRRSPLKPKWKKGPTRGKGGPQAMCEYR  | GVR    | QR    | TW   | GK  | WV   | AE   | IR  | EP  | EN  | --- | --- | --- |
|     | PtrDREB20 | ---                           | MTRP   | QQR   | RYR  | GVR | QR   | HW   | GS  | WV  | SE  | IR  | HPL | --- |
|     | PtrDREB21 | ---                           | HFTNTY | QTSRS | FET  | FL  | SIT  | MTRP | QQR | RYR | GVR | QR  | HW  | GS  |
|     | PtrDREB22 | ---                           | MARP   | QQR   | RYR  | GVR | QR   | HW   | GS  | WV  | SE  | IR  | HPL | --- |
|     | PtrDREB23 | ---                           | MARP   | QQR   | RYR  | GVR | QR   | HW   | GS  | WV  | SE  | IR  | HPL | --- |
|     | PtrDREB24 | ---                           | MVQ    | SKK   | FR   | GVR | QR   | QW   | GS  | WV  | SE  | IR  | HPL | --- |
|     | PtrDREB25 | ---                           | MILIC  | SSV   | FLS  | FLS | QIMV | Q    | SKK | FR  | GVR | QR  | QW  | GS  |
|     | PtrDREB27 | ---                           | MV     | S     | K    | F   | R    | G    | V   | R   | G   | V   | R   | G   |
|     | PtrDREB28 | ---                           | MV     | S     | K    | F   | R    | G    | V   | R   | G   | V   | R   | G   |
|     | PtrDREB26 | ---                           | MV     | S     | K    | F   | R    | G    | V   | R   | G   | V   | R   | G   |
| A-3 | PtrDREB1  | ---                           | TNS    | NN    | SS   | G   | SS   | R    | K   | C   | K   | G   | G   | P   |
|     | PtrDREB2  | ---                           | TNS    | NN    | SS   | G   | SS   | R    | K   | C   | K   | G   | G   | P   |
| A-4 | PtrDREB45 | ---                           | ME     | ER    | N    | T   | A    | S    | H   | --- | --- | --- | --- | --- |
|     | PtrDREB46 | ---                           | ME     | ER    | N    | T   | ---  | ---  | --- | --- | --- | --- | --- | --- |
|     | PtrDREB44 | ---                           | ME     | GR    | N    | S   | T    | A    | H   | --- | --- | --- | --- | --- |
|     | PtrDREB48 | ---                           | L      | L     | L    | A   | K    | M    | E   | G   | R   | T   | R   | D   |
|     | PtrDREB49 | ---                           | ME     | GR    | I    | R   | D    | G    | H   | L   | --- | --- | --- | --- |
|     | PtrDREB47 | ---                           | ME     | GR    | S    | R   | D    | A    | H   | G   | --- | --- | --- | --- |
|     | PtrDREB52 | ---                           | TR     | G     | S    | G   | T    | ---  | --- | --- | --- | --- | --- | --- |
|     | PtrDREB53 | ---                           | TR     | G     | S    | G   | N    | ---  | --- | --- | --- | --- | --- | --- |
|     | PtrDREB51 | ---                           | PR     | G     | S    | G   | T    | ---  | --- | --- | --- | --- | --- | --- |
|     | PtrDREB66 | ---                           | GN     | EG    | K    | R   | R    | K    | T   | T   | E   | N   | --- | --- |
|     | PtrDREB75 | ---                           | GN     | EG    | N    | K   | R    | K    | T   | T   | R   | N   | --- | --- |
|     | PtrDREB67 | ---                           | NY     | ES    | D    | K   | A    | K    | R   | R   | G   | N   | --- | --- |
|     | PtrDREB68 | ---                           | NN     | ES    | N    | K   | A    | K    | S   | G   | G   | N   | --- | --- |
|     | PtrDREB69 | ---                           | I      | Q     | ---  | --- | ---  | ---  | --- | --- | --- | --- | --- | --- |
|     | PtrDREB70 | ---                           | V      | D     | ---  | --- | ---  | ---  | --- | --- | --- | --- | --- | --- |
|     | PtrDREB71 | ---                           | E      | E     | N    | P   | R    | K    | P   | R   | E   | S   | T   | S   |
|     | PtrDREB72 | ---                           | E      | K     | N    | L   | R    | K    | P   | R   | E   | --- | --- | --- |
|     | PtrDREB73 | ---                           | S      | P     | ---  | --- | ---  | ---  | --- | --- | --- | --- | --- | --- |
|     | PtrDREB74 | ---                           | S      | P     | ---  | --- | ---  | ---  | --- | --- | --- | --- | --- | --- |
|     | PtrDREB54 | ---                           | A      | A     | A    | --- | ---  | ---  | --- | --- | --- | --- | --- | --- |
|     | PtrDREB55 | ---                           | S      | A     | S    | A   | I    | A    | P   | K   | --- | --- | --- | --- |
|     | PtrDREB56 | ---                           | R      | P     | I    | R   | P    | P    | G   | S   | A   | S   | A   | P   |
|     | PtrDREB57 | ---                           | R      | ---   | ---  | --- | ---  | ---  | --- | --- | --- | --- | --- | --- |
|     | PtrDREB58 | ---                           | M      | A     | T    | T   | S    | ---  | --- | --- | --- | --- | --- | --- |
|     | PtrDREB59 | ---                           | M      | A     | T    | T   | S    | ---  | --- | --- | --- | --- | --- | --- |
| A-5 | PtrDREB29 | ---                           | P      | C     | K    | S   | A    | P    | P   | K   | V   | R   | Q   | --- |
|     | PtrDREB34 | ---                           | R      | R     | E    | R   | G    | D    | --- | --- | --- | --- | --- | --- |
|     | PtrDREB35 | ---                           | R      | R     | E    | R   | R    | V    | --- | --- | --- | --- | --- | --- |
|     | PtrDREB40 | ---                           | S      | S     | S    | G   | Q    | Q    | S   | D   | R   | N   | --- | --- |
|     | PtrDREB41 | ---                           | S      | S     | S    | V   | S    | E    | Q   | Q   | S   | D   | R   | N   |
|     | PtrDREB42 | ---                           | N      | T     | E    | K   | P    | V    | A   | E   | R   | --- | --- | --- |
|     | PtrDREB43 | ---                           | S      | V     | E    | K   | P    | V    | A   | E   | R   | --- | --- | --- |
|     | PtrDREB36 | ---                           | I      | Q     | S    | E   | A    | S    | K   | P   | V   | A   | I   | S   |
|     | PtrDREB37 | ---                           | I      | Q     | S    | E   | T    | S    | T   | P   | M   | P   | T   | S   |
| A-6 | PtrDREB11 | ---                           | Q      | K     | P    | S   | F    | S    | S   | A   | S   | T   | S   | P   |
|     | PtrDREB12 | ---                           | Q      | K     | P    | S   | F    | S    | S   | A   | S   | T   | S   | P   |
|     | PtrDREB13 | ---                           | H      | S     | S    | N   | L    | A    | P   | T   | K   | --- | --- | --- |
|     | PtrDREB16 | ---                           | R      | A     | S    | N   | F    | L    | A   | P   | K   | P   | V   | M   |
|     | PtrDREB18 | ---                           | R      | T     | S    | N   | F    | L    | A   | P   | K   | P   | V   | M   |
|     | PtrDREB17 | ---                           | Q      | T     | L    | K   | F    | L    | S   | P   | K   | P   | I   | M   |
|     | PtrDREB19 | ---                           | Q      | T     | L    | K   | F    | L    | S   | P   | K   | P   | V   | M   |
|     | PtrDREB14 | ---                           | P      | N     | G    | R   | P    | L    | F   | R   | P   | P   | I   | Q   |
|     | PtrDREB15 | ---                           | P      | D     | G    | R   | P    | L    | F   | R   | P   | P   | I   | Q   |

△ △
